# Supplementary material
Source: Research Square preprint supplement (doi:10.21203/rs.3.rs-9962430/v1)
Supplement: Supplementary file 1 [file 741c0b9c8c84ecf61fac0c37.docx]

Table S1. The primer sequences of target genes for qRT-PCR.

| Gene name | Sequences (5’-3’) |
| --- | --- |
| Human-SYK | sense - CATCAGTCAGAAGCCTCAG |
| antisense -TAGGAGCCGTTGTTGTCT |
| Human-AKT1 | sense -ACGCTACTTCCTCCTCAA |
| antisense -CTCCTCCTCCTGCTTCTT |
| Human-GAPDH | sense -ACAGCCTCAAGATCATCAG |
| antisense -AGTCCTTCCACGATACCA |
