# Supplementary material
Source: Research Square preprint supplement (doi:10.21203/rs.3.rs-9962430/v1)
Supplement: Supplementary file 2 [file dee4651823f4a8990bf9cd42.docx]

Table S2. siRNA sequences targeting the SYK gene in human breast cancer cell lines.

| Gene name | Sequences (5’-3’) |
| --- | --- |
| Human-siSYK-299 | Sense- GCAUGAGUGAUGGGCUUUAUUTT |
| Antisense- AAUAAAGCCCAUCACUCAUGCTT |
| Human-siSYK-1058 | Sense- CGGGUGGAAUAAUCUCAAGAATT |
| Antisense- UUCUUGAGAUUAUUCCACCCGTT |
| Human-siSYK-2079 | Sense- GCGCAAUUACUACUAUGACGUTT |
| Antisense- ACGUCAUAGUAGUAAUUGCGCTT |
| Human-siRNA-NC | Sense- UUC UCC GAA CGU GUC ACG UTT |
| Antisense- ACG UGA CAC GUU CGG AGA ATT |
